# Supplementary material for: Combined Use of Structure Analysis, Studies of Molecular Association in Solution, and Molecular Modelling to Understand the Different Propensities of Dihydroxybenzoic Acids to Form Solid Phases
Source: MDPI journal article supplement (doi:10.3390/pharmaceutics13050734), 2021-05-16
Supplement: s1 [file s1]

# Supplementary Materials: Combined Use of Structure Analysis, Studies of Molecular Association in Solution, and Molecular Modelling to Understand the Different Propensities of Dihydroxybenzoic Acids to Form Solid Phases

Aija Trimdale, Anatoly Mishnev and Agris Bērziņš

**Table S1.** Summary of the results obtained in solid form screening from common solvents by using cooling crystallization and crystallization by slow evaporation in ambient conditions.

| Compound;<br>Solvent                                                        | 2,3-diOHBA | 2,5-diOHBA                 | 2,4-diOHBA                     | 2,6-diOHBA<br>A       | 3,4-diOHBA                                          | 3,5-diOHBA                                               |
|-----------------------------------------------------------------------------|------------|----------------------------|--------------------------------|-----------------------|-----------------------------------------------------|----------------------------------------------------------|
| Group                                                                       | Group A    | Group B                    | Group B                        | Group C               | Group D                                             | Group D                                                  |
| Obtained known nonsolvated and hydrated phases and their respected refcodes | I          | I                          | I                              | I                     | I                                                   |                                                          |
|                                                                             | (CACDAM)   | (BESKAL01)                 | (ZZZEEU08)                     | (LEZJAB01)            | (WUYNUA)                                            |                                                          |
|                                                                             | II         | II                         | II                             | II                    | MH I                                                | I                                                        |
|                                                                             | (CACDAM01) | (BESKAL08)                 | (ZZZEEU04)                     | (LEZJAB)              | (BIJDON03)                                          | (WUYPOW01)                                               |
|                                                                             |            |                            | HH                             | MH                    | MH II                                               |                                                          |
|                                                                             |            |                            | (QIVTUK)                       | (LEZJEF)              | (BIJDON04)                                          |                                                          |
| Initial form used                                                           | I          | II                         | II                             | II                    | I                                                   | I                                                        |
| Acetone                                                                     | I          | II + I                     | II                             | MH                    | MH I + MH II                                        | S <sub>0.2</sub> acetone MH (OKEKEV)                     |
| Tetrahydrofuran THF                                                         | I          | II                         | I / II                         | MH                    | I + MH I + MH II                                    | S <sub>0.25</sub> THF MH (WUYPIQ) / S <sub>0.5</sub> THF |
| Acetonitrile ACN                                                            | I          | II                         | II                             | MH + II               | S <sub>ACN</sub> (EDU-WUW)/S <sub>ACN</sub> + MH II | S <sub>ACN</sub>                                         |
| 1,4-dioxane DXN                                                             | I          | II                         | II + I                         | MH                    | S <sub>0.5</sub> DXN/S <sub>0.5</sub> DXN+MH I      | S <sub>DXN</sub> (WUYPEM)                                |
| Nitromethane NM                                                             | I + II     | II + I                     | I                              | I + II + MH           | MH II                                               | I                                                        |
| Methanol MeOH                                                               | I + II     | II + I                     | II / HH                        | MH + II               | MH I                                                | ? + I                                                    |
| Ethanol EtOH                                                                | I          | II                         | II + HH                        | MH                    | MH I                                                | ? + I                                                    |
| 2-propanol IPA                                                              | I          | I + II                     | II + I                         | II                    | MH I                                                | I + HH (OKEMAT)                                          |
| Ethyl acetate EtOAc                                                         | II / I     | II + I                     | II                             | MH + II               | MH I                                                | S <sub>0.3</sub> EtOAc MH I (OKEKAR)                     |
| Methyl ethyl ketone MEK                                                     | I          | I / I + II                 | I + HH                         | II + MH               | MH I / ? + MH I                                     | S <sub>?</sub> MEK ?H                                    |
| Acetophenone PhAc                                                           | I          | II                         | S <sub>PhAc</sub>              | S <sub>0.5</sub> PhAc | S <sub>0.2</sub> PhAc +MH I/S <sub>0.2</sub> PhAc   | S <sub>?</sub> PhAc ?H                                   |
| Toluene                                                                     | II + I     | –                          | –                              | I                     | –                                                   | I                                                        |
| Benzyl alcohol BnOH                                                         | I          | II + I                     | S <sub>0.2</sub> BnOH or MH II | –                     | MH I                                                | –                                                        |
| Acetic acid AcOH                                                            | I          | S <sub>AcOH</sub> (YOVVOW) | S <sub>AcOH</sub>              | II + MH               | S <sub>AcOH</sub> /I + S <sub>AcOH</sub>            | S <sub>?</sub> AcOH ?H                                   |
| Formic acid                                                                 | I          | II                         | II + I                         | MH                    | MH I                                                | I                                                        |
| Propionic acid                                                              | I          | II                         | II + I                         | MH                    | MH I                                                | I                                                        |

| Compound;<br>Solvent | 2,3-diOHBA                 | 2,5-diOHBA        | 2,4-diOHBA                    | 2,6-diOHBA<br>A  | 3,4-diOHBA                      | 3,5-diOHBA                           |
|----------------------|----------------------------|-------------------|-------------------------------|------------------|---------------------------------|--------------------------------------|
| DMSO                 | <b>S<sub>?</sub> DMSO</b>  | S <sub>DMSO</sub> | S <sub>DMSO</sub><br>(UNAYOY) | –                | S <sub>DMSO</sub>               | S <sub>0.7 DMSO</sub> HH<br>(OKEJOE) |
| DMA                  | <b>S<sub>1.5</sub> DMA</b> | II                | S <sub>2</sub> DMA            | S <sub>DMA</sub> | S <sub>0.7</sub> DMA            | S <sub>?</sub> DMA ?H                |
| DMF                  | I                          | S <sub>DMF</sub>  | II + I                        | –                | <b>S<sub>?</sub> DMF + MH I</b> | –                                    |
| Water                | I                          | II                | HH / HH + II                  | MH               | MH I                            | MH<br>(disordered)                   |

**Highlighted** –previously undescribed solvated phases were obtained for which thermal analysis data were also obtained.

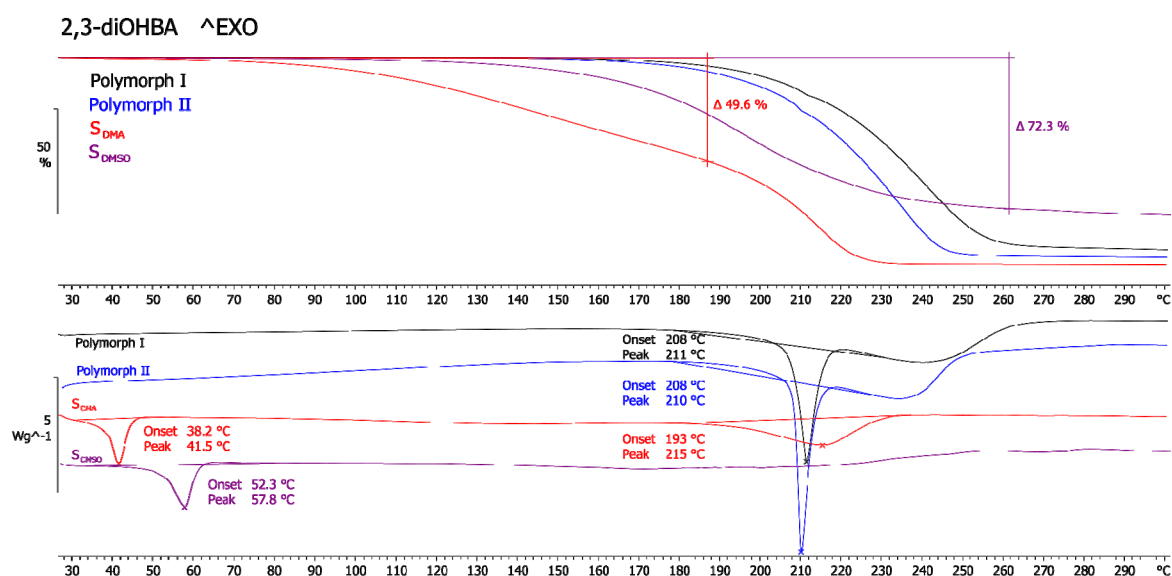

**Figure S1.** DSC-TG analysis of nonsolvated and undescribed solvated phases of 2,3-diOHBA.

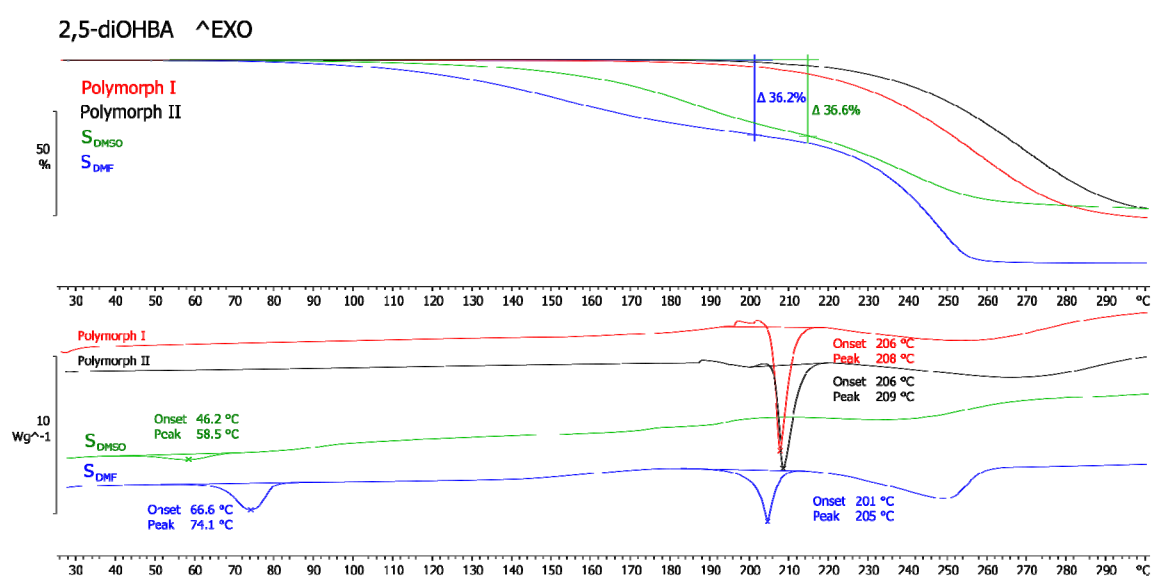

**Figure S2.** DSC-TG analysis of nonsolvated and undescribed solvated phases of 2,5-diOHBA.

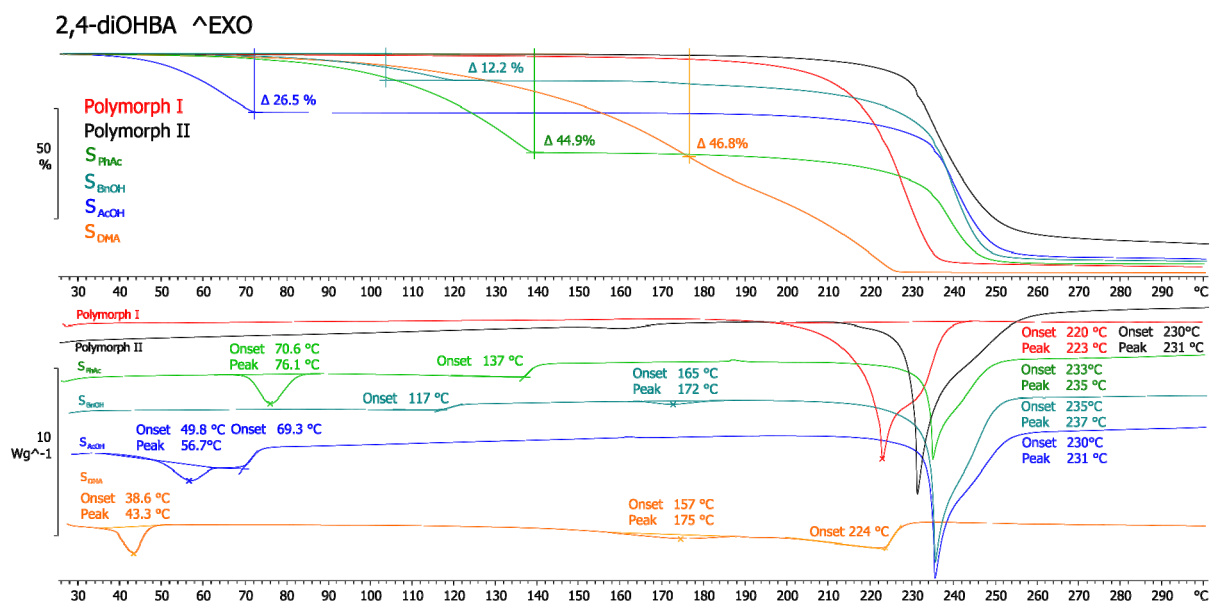

Figure S3. DSC-TG analysis of nonsolvated and undescribed solvated phases of 2,4-diOHBA.

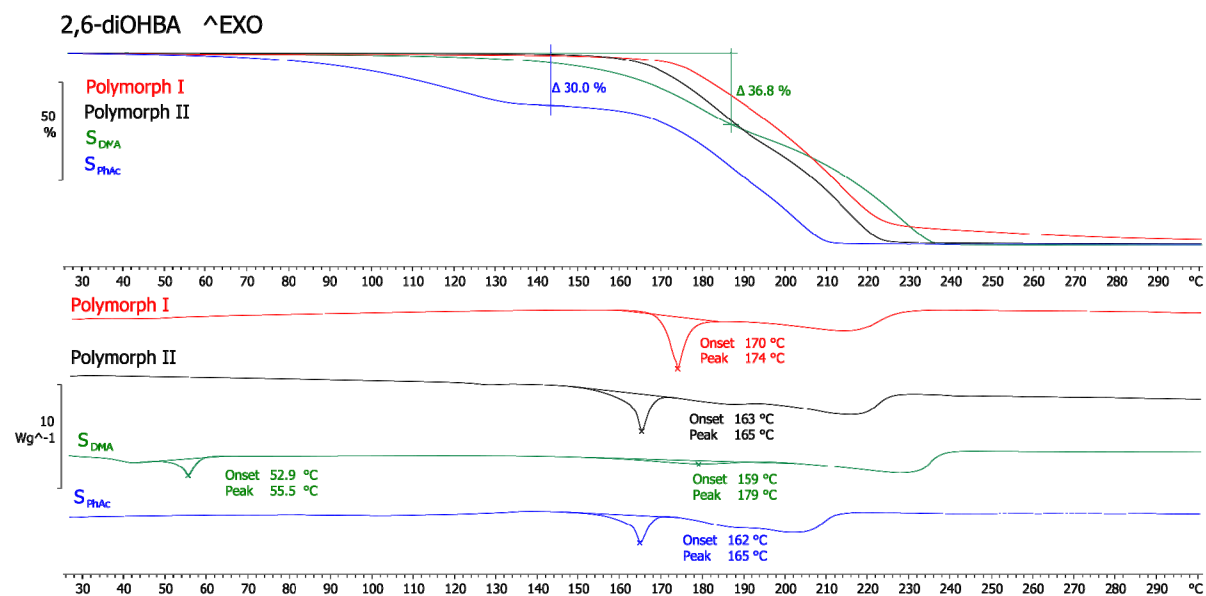

Figure S4. DSC-TG analysis of nonsolvated and undescribed solvated phases of 2,6-diOHBA.

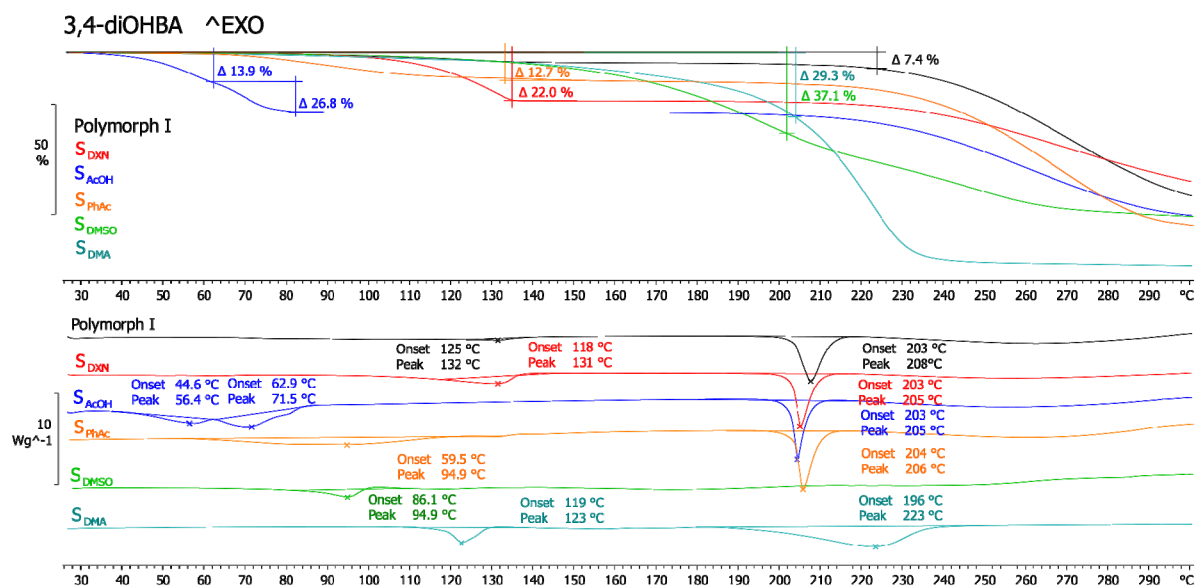

Figure S5. DSC-TG analysis of nonsolvated and undescribed solvated phases of 3,4-diOHBA.

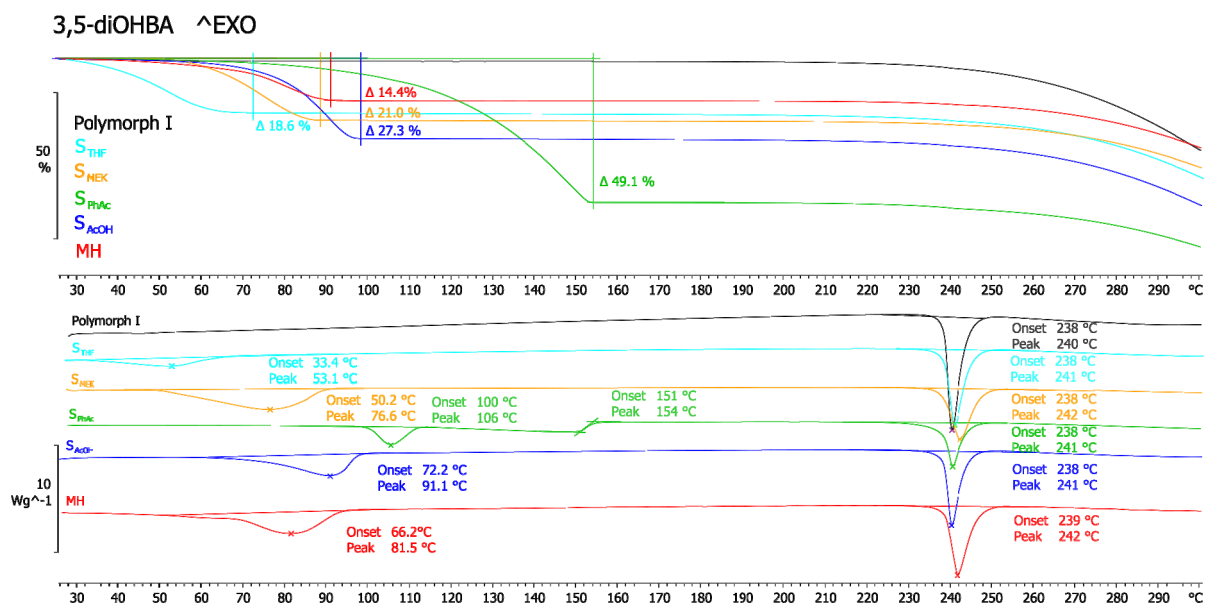

Figure S6. DSC-TG analysis of nonsolvated and undescribed solvated phases of 3,5-diOHBA.

**Table S2.** Crystal data and structure refinement details for newly characterized solvates.

| Compound                                           | 3,4-diOHBA           | 3,5-diOHBA           | 3,5-diOHBA       |
|----------------------------------------------------|----------------------|----------------------|------------------|
| Form                                               | S <sub>0.5</sub> DXN | S <sub>0.5</sub> THF | S <sub>ACN</sub> |
| Space group                                        | P-1                  | P-1                  | P-1              |
| a, Å                                               | 5.0168(1)            | 9.5853(5)            | 12.5934(4)       |
| b, Å                                               | 9.5096(2)            | 9.9454(4)            | 12.6052(4)       |
| c, Å                                               | 10.4088(3)           | 25.6021(5)           | 19.5070(9)       |
| $\alpha$ , °                                       | 110.172(2)           | 79.195(2)            | 77.204(3)        |
| $\beta$ , °                                        | 102.084(2)           | 80.763(3)            | 87.380(3)        |
| $\gamma$ , °                                       | 95.278(2)            | 77.091(4)            | 67.527(3)        |
| Z                                                  | 2                    | 8                    | 4                |
| Z'                                                 | 1                    | 4                    | 2                |
| Cell volume, Å <sup>3</sup>                        | 448.442(19)          | 2318.77(17)          | 2787.76(19)      |
| Density <sub>calculated</sub> , g·cm <sup>-3</sup> | 1.468                | 1.296                | 1.395            |
| Temperature, K                                     | 293                  | 293                  | 150.0            |
| Absorption coefficient $\mu$ , mm <sup>-1</sup>    | 1.042                | 0.869                | 0.949            |
| Packing index                                      | 70.9                 | 65.0                 | 70.2             |
| $\theta$ range for data collection, °              | 4.6690–75.4540       | 4.7400–75.2710       | 0.9–75.0         |
| Reflections collected/unique                       | 8301/1780            | 25678/8699           | 46330/11599      |
| GooF                                               | 1.070                | 1.053                | 1.041            |
| Final R index ( $I > 2\sigma$ )                    | 0.038                | 0.0728               | 0.0638           |
| wR <sub>2</sub>                                    | 0.119                | 0.2486               | 0.2109           |
| Largest diff. peak and hole, Å <sup>-3</sup>       | 0.138, -0.265        | 0.367, -0.332        | 0.380, -0.275    |

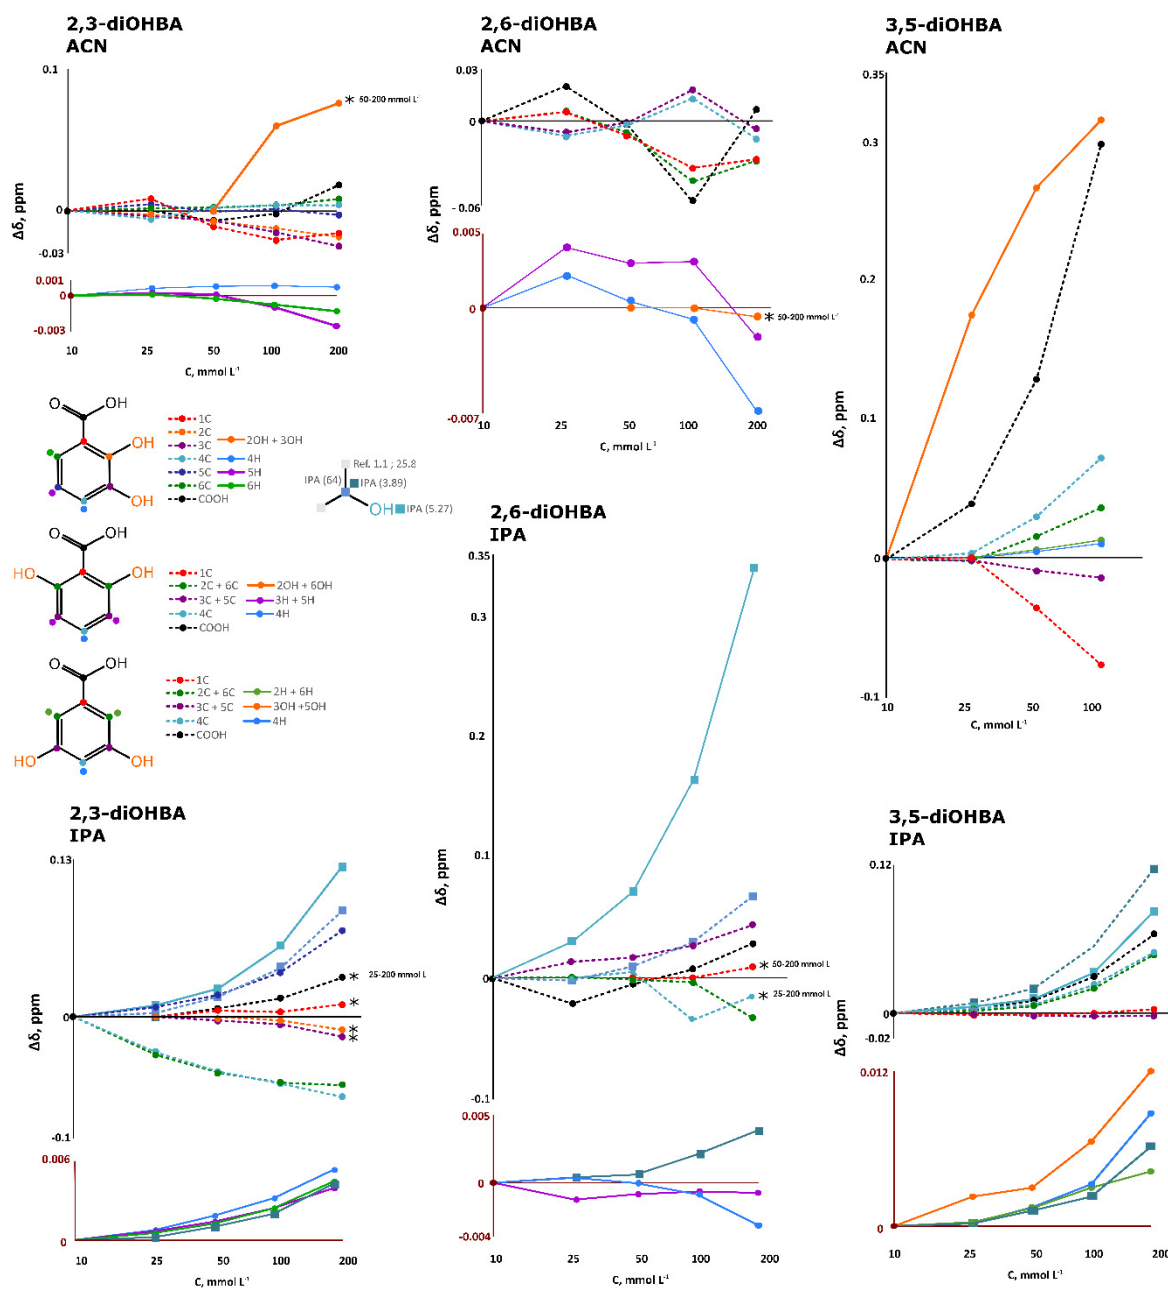

**Figure S7.** The  $^1\text{H}$  and  $^{13}\text{C}$  chemical shift dependence on concentration in the recorded NMR spectra of all 2,4-, 2,6- and 3,5-diOHBA solutions in acetonitrile and 2-propanol.

Logarithmic scale for the concentration axis used. In all graphs two equal scale are used, see black and red axis. Points corresponding to the  $^{13}\text{C}$  chemical shift changes are joined by dotted lines and those corresponding to  $^1\text{H}$  are joined by solid lines, with both lines being guide for the eye. Color coding is used to assign each signal to a particular atom. Asterisks are used to indicate \* – signal in not detected for the lowest concentration solutions.

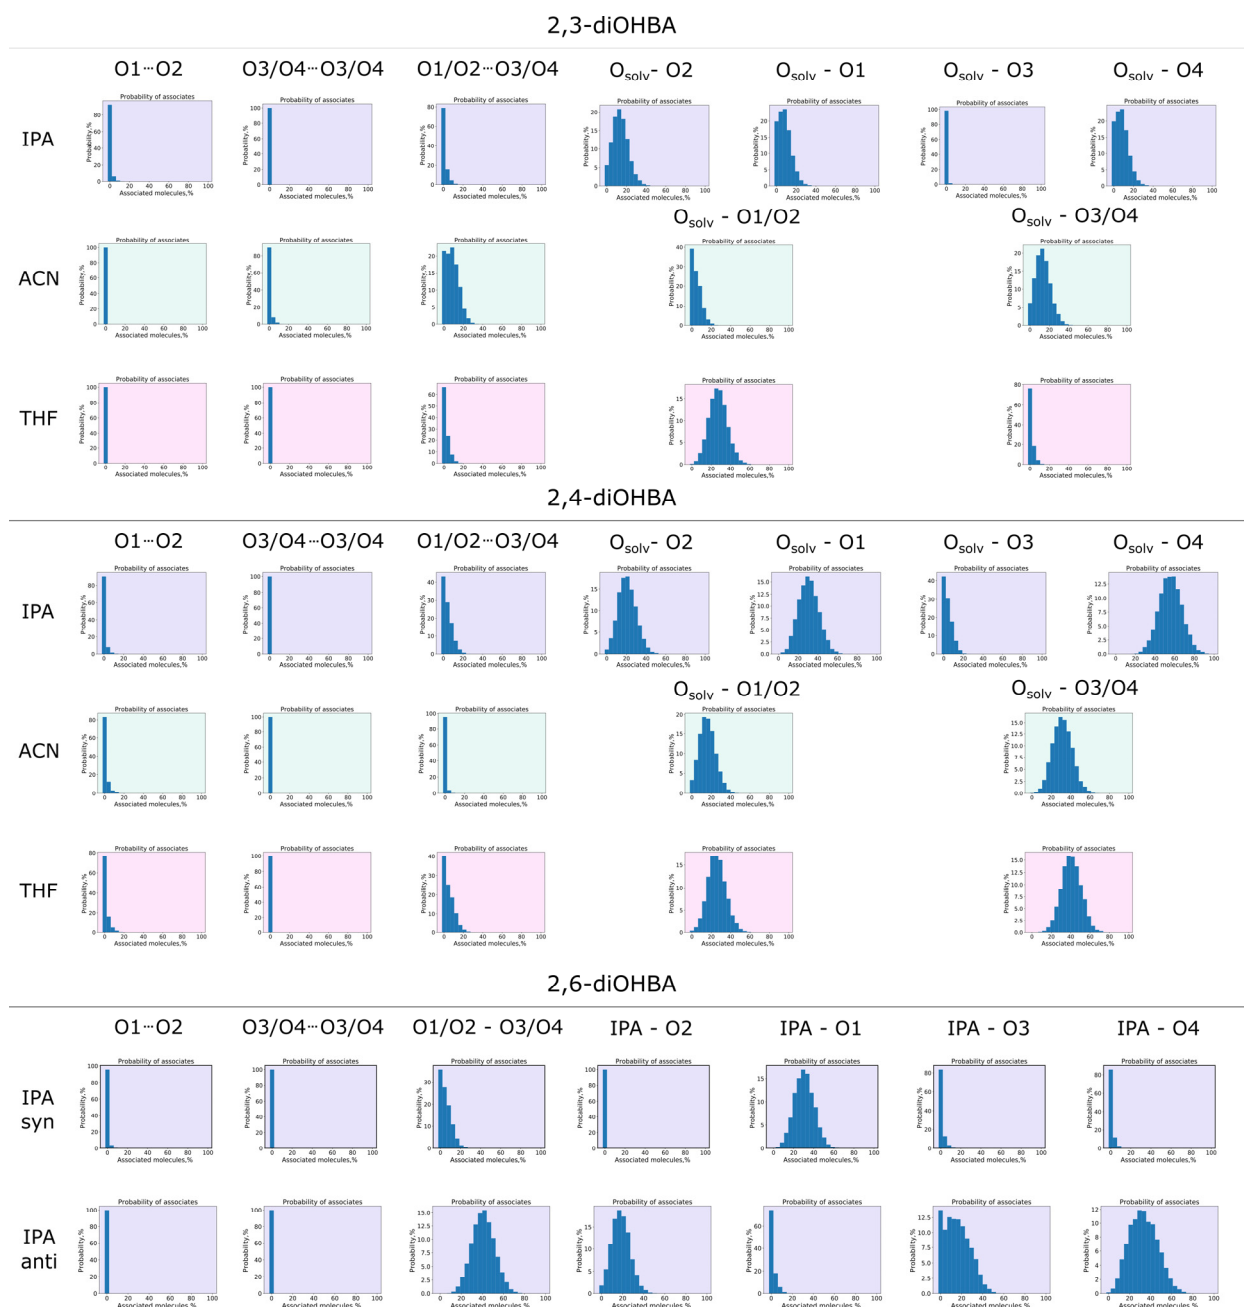

**Figure S8.** Probability for the selected Group A (2,3-diOHBA), Group B (2,4-diOHBA) and Group C (2,6-diOHBA, two conformations) compounds that the given relative amount of diOHBA will be involved in a hydrogen bond between the specified O atoms of diOHBA and specified O atoms of diOHBA and hydroxyl group of 2-propanol (IPA), nitrile group of acetonitrile (ACN) and O atom of tetrahydrofuran (THF).

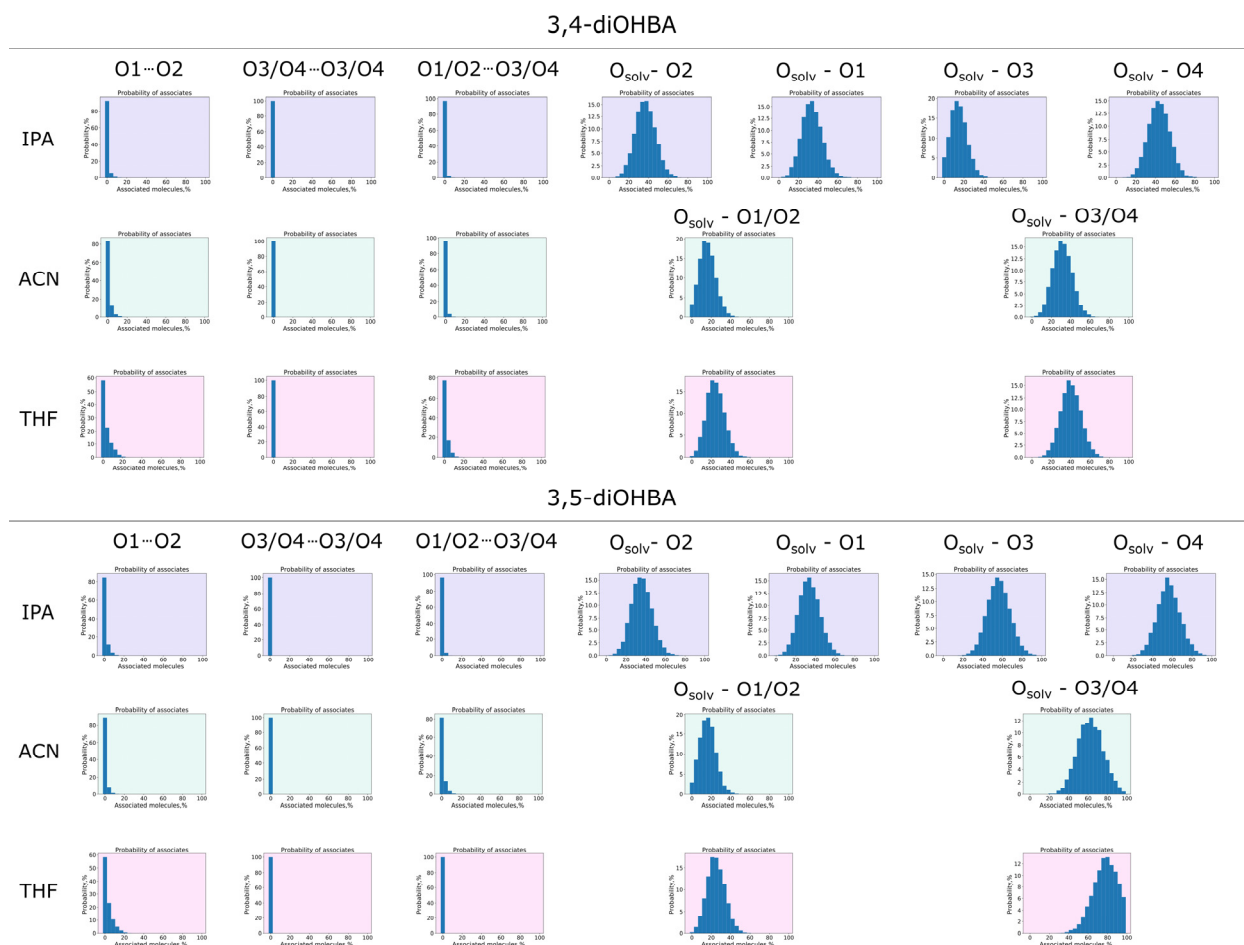

**Figure S9.** Probability for Group D (3,4-, 3,5-diOHBA) compounds that the given relative amount of dOHBA will be involved in a hydrogen bond between the specified O atoms of diOHBA and specified O atoms of diOHBA and hydroxyl group of 2-propanol (IPA), nitrile group of acetonitrile (ACN) and O atom of tetrahydrofuran (THF).



**Table S3.** Summary of structural information on nonsolvated and selected solvated crystalline phases-crystallographic information, calculated packing index and lattice energy, obtained experimental melting enthalpies (nonsolvated phases) and the main hydrogen bond motifs.

| Compound   | Form                | CSD identifier | Space group        | Z, Z'  | Packing index, % | Lattice energy, kJ·mol <sup>-1</sup> | Enthalpy, J·g <sup>-1</sup> | Intramolecular bond | R <sup>2</sup> (8) | RHB motif                                                                                            |
|------------|---------------------|----------------|--------------------|--------|------------------|--------------------------------------|-----------------------------|---------------------|--------------------|------------------------------------------------------------------------------------------------------|
| 2,3-diOHBA | I                   | CACDAM[32]     | P $\overline{1}$   | 4, 2   | 71.8             | -112                                 | -174                        | ✓✓                  | ✓                  | R <sup>12</sup> <sub>14</sub> (34)                                                                   |
|            | II                  | CACDAM01[38]   | P2 <sub>1</sub> /n | 4, 1   | 74.6             | -110                                 | -176                        | ✓✓                  | ✓                  | -                                                                                                    |
| 2,5-diOHBA | I                   | BESKAL01[33]   | Pa                 | 4, 2   | 71.8             | -118                                 | -205                        | ✓                   | ✓                  | R <sup>6</sup> <sub>8</sub> (36)                                                                     |
|            | II                  | BESKAL08[62]   | P2 <sub>1</sub> /n | 4, 1   | 73.7             | -120                                 | -194                        | ✓                   | ✓                  | R <sup>6</sup> <sub>8</sub> (36)                                                                     |
| 2,4-diOHBA | I                   | ZZZEEU08[34]   | P2 <sub>1</sub> /a | 4, 1   | 71.3             | -114                                 | *                           | ✓                   | ✓                  | R <sup>6</sup> <sub>6</sub> (24), R <sup>6</sup> <sub>8</sub> (36), R <sup>6</sup> <sub>8</sub> (44) |
|            | II                  | ZZZEEU04[63]   | P2 <sub>1</sub> /n | 4, 1   | 74.1             | -134                                 | *                           | ✓                   | ✓                  | R <sup>6</sup> <sub>8</sub> (36)                                                                     |
|            | HH                  | QIVTUK[26]     | P $\overline{1}$   | 2, 1   | 71.3             | -                                    | -                           | ✓                   | ✓                  | -                                                                                                    |
|            | MH                  | YUXGUAV[64]    | P $\overline{1}$   | 2, 1   | 70.6             | -                                    | -                           | ✓                   | ✓                  | -                                                                                                    |
| 2,6-diOHBA | II                  | LEZJAB[36]     | Pna2 <sub>1</sub>  | 4, 1   | 72.2             | -118                                 | -115                        | ✓✓                  | -                  | -                                                                                                    |
|            | I                   | LEZJAB01[35]   | P2 <sub>1</sub> /c | 4, 1   | 74.3             | -123                                 | -42                         | ✓✓                  | ✓                  | -                                                                                                    |
|            | MH                  | LEZJEF[35]     | Pnma               | 8, 0.5 | 73.2             | -                                    | -                           | ✓                   | -                  | -                                                                                                    |
| 3,4-diOHBA | I                   | WUYNUA[38]     | P $\overline{1}$   | 6, 3   | 70.6             | -139                                 | -193                        | ✓                   | ✓                  | R <sup>6</sup> <sub>6</sub> (34)                                                                     |
|            | MH I                | BIJDON03[26]   | P $\overline{1}$   | 2, 2   | 73.6             | -                                    | -                           | ✓                   | ✓                  | -                                                                                                    |
|            | MH II               | BIJDON04[38]   | P2 <sub>1</sub> /c | 4, 1   | 73.1             | -                                    | -                           | ✓                   | ✓                  | -                                                                                                    |
|            | S <sub>ACN</sub>    | EDUWUW[37]     | P2 <sub>1</sub> /c | 4, 1   | 71.9             | -                                    | -                           | ✓                   | ✓                  | R <sup>6</sup> <sub>6</sub> (38)                                                                     |
|            | S <sub>0.5DXN</sub> | 2077764        | P $\overline{1}$   | 2, 1   | 70.9             | -                                    | -                           | ✓                   | ✓                  | -                                                                                                    |
| 3,5-diOHBA | I                   | WUYPOW01[38]   | C 2/c              | 24, 3  | 71.0             | -151                                 | -266                        | -                   | ✓                  | R <sup>6</sup> <sub>6</sub> (40)                                                                     |
|            | II                  | WUYPOW[38]     | C 2/c              | 4, 0.5 | 71.6             | -133                                 | -                           | -                   | -                  | -                                                                                                    |
|            | HH                  | OKEMAT[39]     | P2 <sub>1</sub>    | 2, 1   | 73.4             | -                                    | -                           | -                   | -                  | -                                                                                                    |

|                         |            |                    |      |      |   |   |   |   |                     |
|-------------------------|------------|--------------------|------|------|---|---|---|---|---------------------|
| S <sub>0,25THF</sub> MH | WUYPIQ[38] | Cc                 | 4, 1 | 71.5 | - | - | - | ✓ | R <sub>6</sub> (40) |
| S <sub>0.5THF</sub>     | 2077766    | P <sub>1</sub>     | 8, 4 | 65.0 | - | - | - | ✓ | R <sub>6</sub> (40) |
| S <sub>ACN</sub>        | 2077765    | P <sub>1</sub>     | 4, 2 | 70.2 | - |   | - | ✓ | R <sub>6</sub> (40) |
| S <sub>DXN</sub>        | WUYPEM[38] | P2 <sub>1</sub> /c | 4, 1 | 73.6 | - |   | - | - | -                   |

Gray—crystalline phase was not obtained during the crystal form screening.  
Asterisk—the melting signal could not be distinguished from the decomposition and melting enthalpy could not be determined.

## 2,3-diOHBA

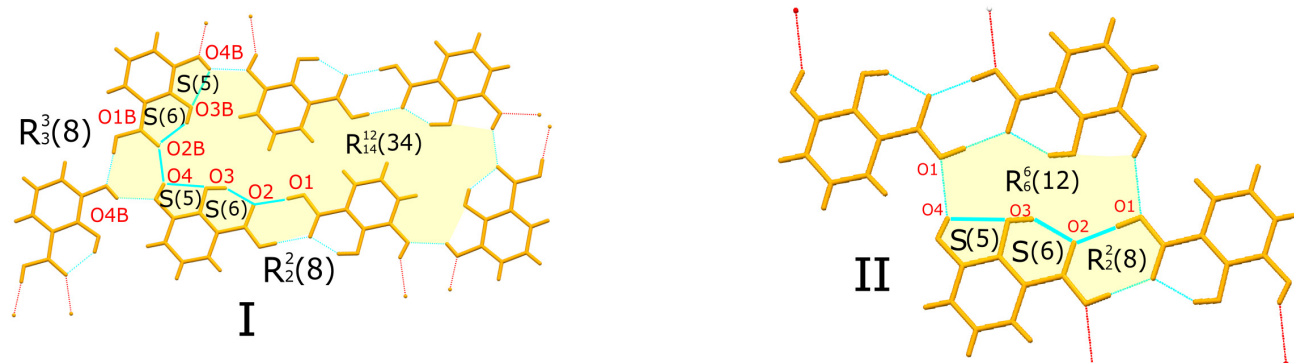

**Figure S10.** Hydrogen bond motifs in crystal structures of all known nonsolvated phases of 2,3-diOHBA.

**Table S4.** Hydrogen bond geometric parameters and motifs in crystal structures of all known nonsolvated phases of 2,3-diOHBA and corresponding hydrogen bond parameters.

| Phase          | Interaction   | Distance, Å |         |          | D–H···A, ° | Graph set                       |                                    |
|----------------|---------------|-------------|---------|----------|------------|---------------------------------|------------------------------------|
|                |               | X–H         | H···A   | D···A    |            |                                 |                                    |
| I<br>CACDAM    | O1–H1···O2    | 0.84        | 1.85    | 2.685(3) | 175        | R <sub>2</sub> <sup>2</sup> (8) | R <sub>12</sub> <sup>14</sup> (34) |
|                | O3–H2···O2    | 0.98        | 1.77    | 2.642(3) | 147        | S(6)                            | R <sub>12</sub> <sup>14</sup> (34) |
|                | O3B–H2B···O2B | 0.82        | 1.93    | 2.626(2) | 143        | S(6)                            | R <sub>12</sub> <sup>14</sup> (34) |
|                | O4B–H3B···O3B | 0.82        | 2.26    | 2.682(2) | 113        | S(6)                            | R <sub>12</sub> <sup>14</sup> (34) |
|                | O4–H3···O3    | 0.88        | 2.24    | 2.699(3) | 113        | S(6)                            | R <sub>12</sub> <sup>14</sup> (34) |
|                | O4–H3···O2B   | 0.88        | 2.05    | 2.809(2) | 144        | R <sub>3</sub> <sup>3</sup> (8) | R <sub>12</sub> <sup>14</sup> (34) |
|                | O4B–H3B···O4  | 0.82        | 2.04    | 2.671(3) | 133        | R <sub>3</sub> <sup>3</sup> (8) | R <sub>12</sub> <sup>14</sup> (34) |
|                | O1B–H1B···O4B | 0.83        | 1.81    | 2.645(2) | 177        | R <sub>3</sub> <sup>3</sup> (8) | R <sub>12</sub> <sup>14</sup> (34) |
| II<br>CACDAM01 | O1–H1···O2    | 0.89(3)     | 1.77(3) | 2.661(3) | 178(3)     | R <sub>2</sub> <sup>2</sup> (8) | R <sub>6</sub> <sup>6</sup> (12)   |
|                | O3–H2···O2    | 0.88(3)     | 1.81(3) | 2.597(3) | 148(3)     | S(6)                            | R <sub>6</sub> <sup>6</sup> (12)   |
|                | O4–H3···O3    | 0.79(3)     | 2.26(3) | 2.689(3) | 115(2)     | S(6)                            | R <sub>6</sub> <sup>6</sup> (12)   |
|                | O4–H3···O1    | 0.79(3)     | 2.32(3) | 3.006(3) | 145(3)     |                                 | R <sub>6</sub> <sup>6</sup> (12)   |

## 2,5-diOHBA

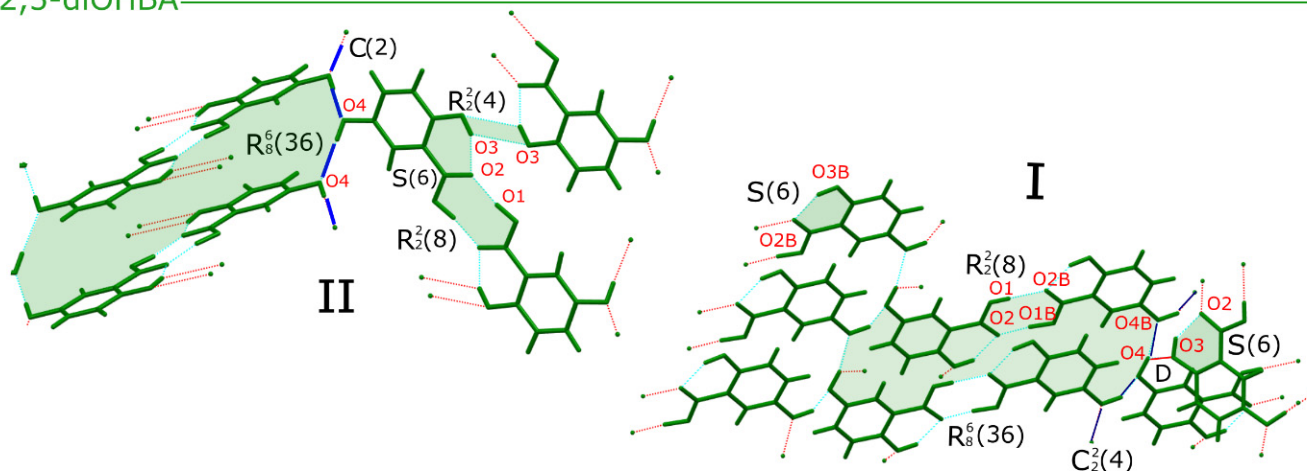

**Figure S11.** Hydrogen bond motifs in crystal structures of all known nonsolvated phases of 2,5-diOHBA.

**Table S5.** Hydrogen bond geometric parameters and motifs in crystal structures of all known nonsolvated phases of 2,5-diOHBA and corresponding hydrogen bond parameters.

| Phase          | Interaction   | Distance, Å |         |          | D–H···A, ° | Graph set                       |                                  |
|----------------|---------------|-------------|---------|----------|------------|---------------------------------|----------------------------------|
|                |               | X–H         | H···A   | D···A    |            |                                 |                                  |
| II<br>BESKAL08 | O1–H1···O2    | 1.05(5)     | 1.68(5) | 2.714(3) | 171(5)     | R <sub>2</sub> <sup>2</sup> (8) | R <sub>6</sub> <sup>8</sup> (36) |
|                | O3–H2···O2    | 0.85(4)     | 1.81(4) | 2.577(4) | 150(4)     | S(6)                            | R <sub>6</sub> <sup>8</sup> (36) |
|                | O4–H5···O4    | 0.82(4)     | 1.95(4) | 2.765(3) | 176(2)     | C(2)                            | R <sub>6</sub> <sup>8</sup> (36) |
|                | O3–H2···O3    | 0.85(4)     | 2.56(4) | 3.109(4) | 124(3)     | R <sub>2</sub> <sup>2</sup> (4) |                                  |
| I<br>BESKAL01  | O1–H1···O2B   | 0.86        | 1.81    | 2.666(2) | 179        | R <sub>2</sub> <sup>2</sup> (8) | R <sub>6</sub> <sup>8</sup> (36) |
|                | O1B–H1B···O2  | 1.14        | 1.54    | 2.672(2) | 170        | R <sub>2</sub> <sup>2</sup> (8) | R <sub>6</sub> <sup>8</sup> (36) |
|                | O3–H2···O2    | 0.90        | 1.87    | 2.630(2) | 141        | S(6)                            | R <sub>6</sub> <sup>8</sup> (36) |
|                | O3B–H2B···O2B | 0.93        | 1.81    | 2.646(2) | 148        | S(6)                            | R <sub>6</sub> <sup>8</sup> (36) |
|                | O4–H5···O4B   | 1.02        | 1.86    | 2.769(2) | 146        | C <sub>2</sub> <sup>2</sup> (4) | R <sub>6</sub> <sup>8</sup> (36) |
|                | O4B–H5B···O4  | 0.96        | 1.96    | 2.723(2) | 135        | C <sub>2</sub> <sup>2</sup> (4) | R <sub>6</sub> <sup>8</sup> (36) |

## 2,4-diOHBA

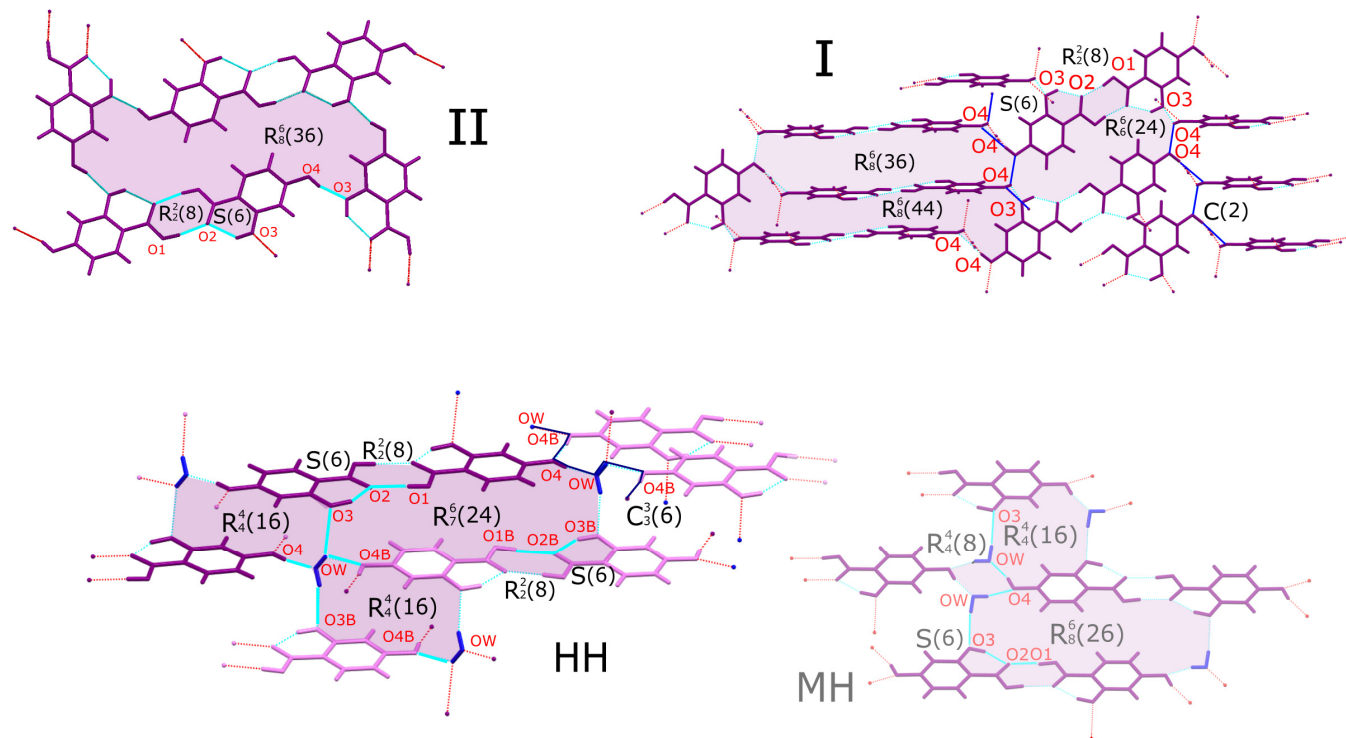

**Figure S12.** Hydrogen bond motifs in crystal structures of all known nonsolvated and hydrated phases of 2,5-diOHBA.

**Table S6.** Hydrogen bond geometric parameters and motifs in crystal structures of all known nonsolvated phases of 2,4-diOHBA and corresponding hydrogen bond parameters.

| Phase          | Interaction | Distance, Å |          |          | D-H...A, ° | Graph set                                                           |                                                                      |
|----------------|-------------|-------------|----------|----------|------------|---------------------------------------------------------------------|----------------------------------------------------------------------|
|                |             | X-H         | H...A    | D...A    |            |                                                                     |                                                                      |
| II<br>ZZZEEU04 | O1-H1...O2  | 0.90        | 1.76     | 2.658(2) | 171        | R <sub>2</sub> <sup>2</sup> (8)                                     | R <sub>6</sub> <sup>8</sup> (36)                                     |
|                | O3-H2...O2  | 0.90        | 1.96     | 2.631(2) | 130        | S(6)                                                                | R <sub>6</sub> <sup>8</sup> (36)                                     |
|                | O4-H4...O3  | 0.87(3)     | 1.93(3)  | 2.782(2) | 166(3)     | D                                                                   | R <sub>6</sub> <sup>8</sup> 3(36)                                    |
| I<br>ZZZEEU08  | O1-H1...O2  | 0.900(4)    | 1.749(3) | 2.633(3) | 166.5(4)   | R <sub>2</sub> <sup>2</sup> (8)<br>R <sub>6</sub> <sup>6</sup> (24) | R <sub>6</sub> <sup>8</sup> (36)<br>R <sub>6</sub> <sup>8</sup> (44) |
|                | O3-H2...O2  | 0.900(3)    | 1.881(3) | 2.654(3) | 142.9(3)   | S(6)<br>R <sub>6</sub> <sup>6</sup> (24)                            | R <sub>6</sub> <sup>8</sup> (36)<br>R <sub>6</sub> <sup>8</sup> (44) |
|                | O4-H4...O3  | 0.900(4)    | 2.112(3) | 2.827(3) | 135.7(3)   | D                                                                   | R <sub>6</sub> <sup>8</sup> (24)<br>R <sub>6</sub> <sup>8</sup> (44) |
|                | O4-H4...O4  | 0.950(3)    | 2.493(3) | 3.302(3) | 143.0(2)   | C(2)                                                                | R <sub>6</sub> <sup>8</sup> (36)<br>R <sub>6</sub> <sup>6</sup> (24) |
|                |             |             |          |          |            |                                                                     |                                                                      |

**Table S7.** Hydrogen bond geometric parameters and motifs in crystal structures of all known hydrated phases of 2,4-diOHBA and corresponding hydrogen bond parameters.

| Phase        | Interaction  | Distance, Å |         |            | D–H··A, ° | Graph set                        |                                  |
|--------------|--------------|-------------|---------|------------|-----------|----------------------------------|----------------------------------|
|              |              | X–H         | H··A    | D··A       |           |                                  |                                  |
| HH<br>QIVTUK | O1 H1··O2    | 0.88(2)     | 1.79(2) | 2.6774(16) | 177(2)    | R <sub>2</sub> <sup>2</sup> (8)  | R <sub>6</sub> <sup>7</sup> (24) |
|              | O1B H1B··O2B | 0.87(3)     | 1.78(3) | 2.6476(17) | 175(3)    | R <sub>2</sub> <sup>2</sup> (8)  | R <sub>6</sub> <sup>7</sup> (24) |
|              | O3 H2··O2    | 0.98(3)     | 1.72(3) | 2.6082(17) | 148(3)    | S(6)                             | R <sub>6</sub> <sup>7</sup> (24) |
|              | O3B H2B··O2B | 0.88(2)     | 1.77(2) | 2.5652(17) | 150(2)    | S(6)                             | R <sub>6</sub> <sup>7</sup> (24) |
|              | O4 H4··OW    | 0.82(3)     | 1.80(3) | 2.604(2)   | 168(2)    | R <sub>4</sub> <sup>4</sup> (16) | R <sub>6</sub> <sup>7</sup> (24) |
|              | OW HW1··O3   | 0.82(3)     | 2.40(3) | 3.073(2)   | 141(3)    | R <sub>4</sub> <sup>4</sup> (16) | R <sub>6</sub> <sup>7</sup> (24) |
|              | OW–HW2··O3B  | 0.79(3)     | 2.05(3) | 2.825(2)   | 165(3)    | R <sub>4</sub> <sup>4</sup> (16) | R <sub>6</sub> <sup>7</sup> (24) |
|              | OW–HW1··O4B  | 0.82(3)     | 2.29(4) | 2.903(2)   | 132(3)    | R <sub>4</sub> <sup>4</sup> (16) | C <sub>3</sub> <sup>3</sup> (6)  |
| MH<br>YUXGUV | O4B–H4B··O4  | 0.79(2)     | 1.94(2) | 2.7266(18) | 173.6(19) |                                  | C <sub>3</sub> <sup>3</sup> (6)  |
|              | O1–H1··O2    | 0.89(3)     | 1.78(2) | 2.670(2)   | 175(2)    | R <sub>2</sub> <sup>2</sup> (8)  | R <sub>6</sub> <sup>8</sup> (26) |
|              | O3–H2··O2    | 0.86(3)     | 1.81(2) | 2.5937(19) | 151(3)    | S(6)                             | R <sub>6</sub> <sup>8</sup> (26) |
|              | OW–HW1··O3   | 0.85(3)     | 2.07(3) | 2.919(2)   | 173(3)    | R <sub>4</sub> <sup>4</sup> (16) | R <sub>6</sub> <sup>8</sup> (26) |
|              | OW–HW2··O4   | 0.78(3)     | 2.15(3) | 2.825(2)   | 145(2)    | R <sub>4</sub> <sup>4</sup> (8)  | R <sub>6</sub> <sup>8</sup> (26) |
|              | O4–H4··OW    | 0.83(2)     | 1.86(2) | 2.678(2)   | 167(2)    | R <sub>4</sub> <sup>4</sup> (8)  | R <sub>4</sub> <sup>4</sup> (16) |

Gray– crystalline phase was not obtained during the crystal form screening.

### 2,6-diOHBA

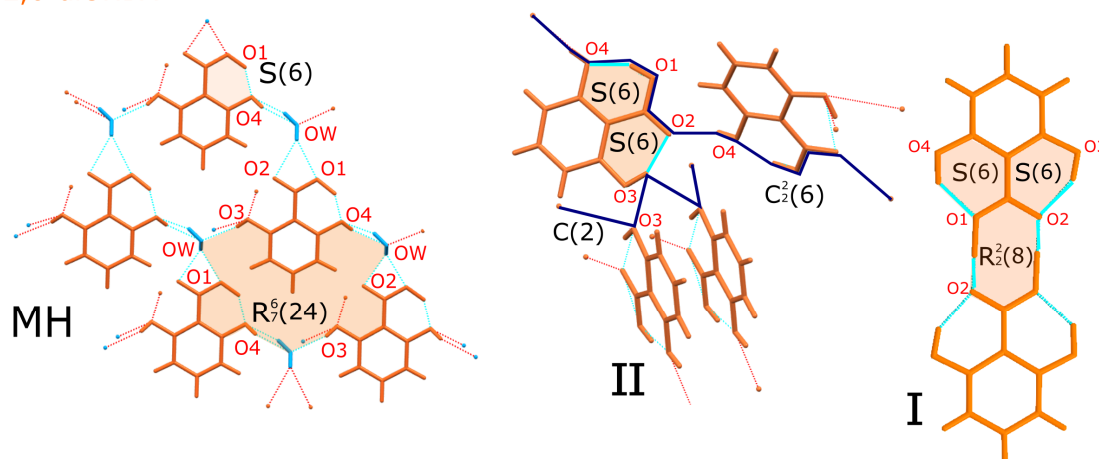**Figure S13.** Hydrogen bond motifs in crystal structures of all known nonsolvated and hydrated phases of 2,6-diOHBA.**Table S8.** Hydrogen bond geometric parameters and motifs in crystal structures of all known nonsolvated and hydrated phases of 2,6-diOHBA and corresponding hydrogen bond parameters.

| Phase         | Interaction | Distance, Å |          |          | D–H··A, ° | Graph set                        |                                 |
|---------------|-------------|-------------|----------|----------|-----------|----------------------------------|---------------------------------|
|               |             | X–H         | H··A     | D··A     |           |                                  |                                 |
| MH<br>LEZJEF  | O1–H1··O4   | 1.14(14)    | 1.58(13) | 2.540(3) | 138(12)   | S(6)                             |                                 |
|               | O1–H1··O1   | 1.14(14)    | 2.31(13) | 2.938(3) | 113(8)    | D                                |                                 |
|               | OW–HW1··O4  | 0.86(11)    | 1.92(10) | 2.705(4) | 152(10)   | R <sub>6</sub> <sup>6</sup> (24) |                                 |
|               | O4–H6··OW   | 0.71(6)     | 2.03(6)  | 2.705(4) | 160(6)    | R <sub>6</sub> <sup>6</sup> (24) |                                 |
|               | OW–HW2··O1  | 0.87(9)     | 2.33(9)  | 3.069(6) | 143(6)    | R <sub>6</sub> <sup>6</sup> (24) |                                 |
| II<br>LEZJAB  | O1–H1··O4   | 0.89(4)     | 1.69(4)  | 2.522(3) | 156(3)    | S(6)                             | C <sub>2</sub> <sup>2</sup> (6) |
|               | O3–H2··O2   | 0.94(3)     | 1.73(3)  | 2.596(3) | 151(3)    | S(6)                             |                                 |
|               | O3–H2··O3   | 0.94(3)     | 2.51(4)  | 2.928(4) | 108(2)    | C(2)                             |                                 |
|               | O4–H6··O2   | 0.76(3)     | 1.95(3)  | 2.683(3) | 161(3)    | C <sub>2</sub> <sup>2</sup> (6)  |                                 |
| I<br>LEZJAB01 | O1–H1··O2   | 1.33(5)     | 1.27(5)  | 2.603(3) | 178(5)    | R <sub>2</sub> <sup>2</sup> (8)  |                                 |
|               | O3–H2··O2   | 0.93(4)     | 1.77(4)  | 2.603(3) | 147(3)    | S(6)                             |                                 |
|               | O4–H6··O1   | 1.00(4)     | 1.79(4)  | 2.584(3) | 134(3)    | S(6)                             |                                 |

## 3,4diOHBA

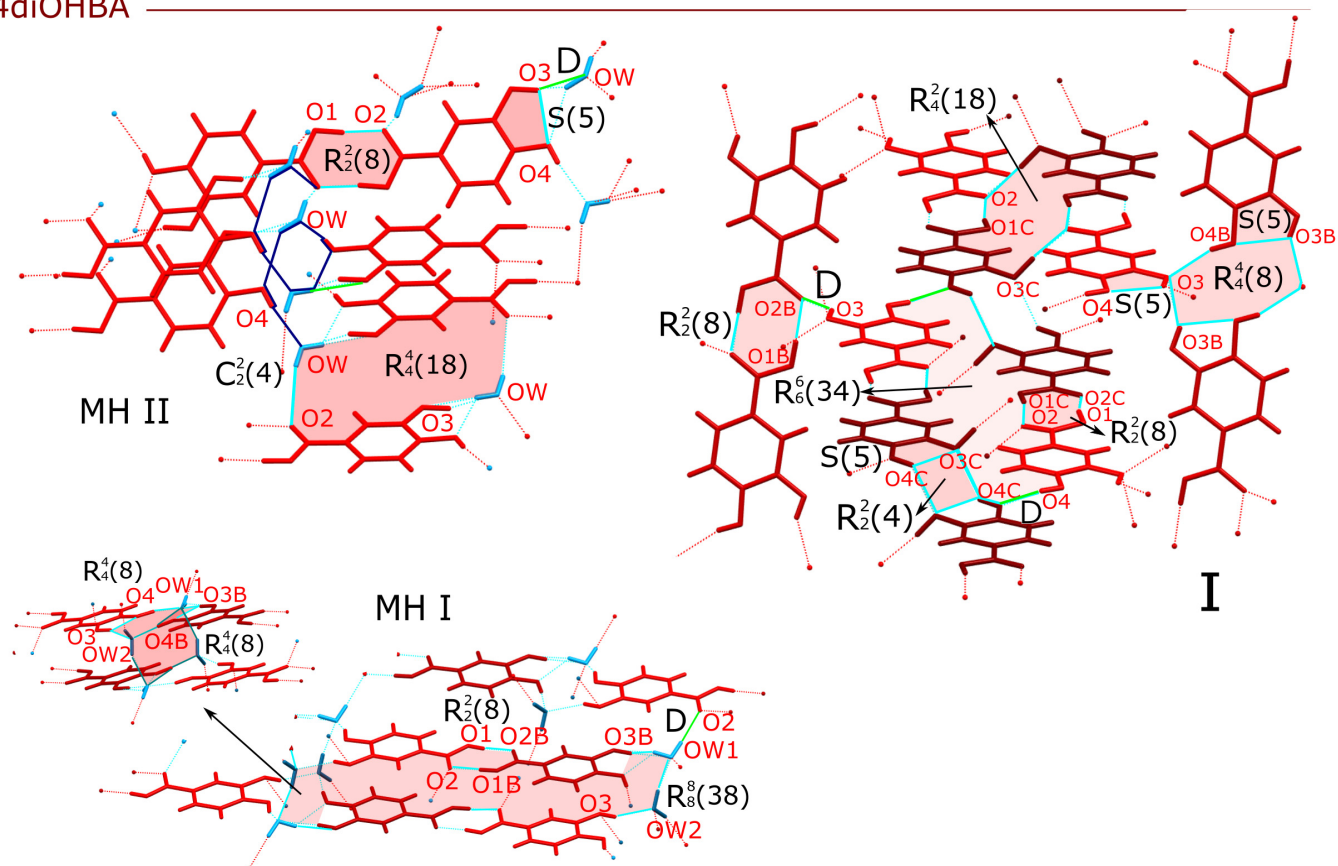

**Figure S14.** Hydrogen bond motifs in crystal structures of all known nonsolvated and hydrated phases of 3,4-diOHBA.

**Table S9.** Hydrogen bond geometric parameters and motifs in crystal structures of all known nonsolvated and hydrated phases of 3,4-diOHBA and corresponding hydrogen bond parameters.

| Phase             | Interaction   | Distance, Å |          |          | D–H···A, ° | Graph set                                                           |                                                                      |
|-------------------|---------------|-------------|----------|----------|------------|---------------------------------------------------------------------|----------------------------------------------------------------------|
|                   |               | X–H         | H···A    | D···A    |            |                                                                     |                                                                      |
| MH II<br>BIJDON04 | O1–H1···O2    | 1.03        | 1.62     | 2.642(5) | 172        | R <sup>2</sup> <sub>2</sub> (8)                                     |                                                                      |
|                   | O3–H3···O4    | 0.99(10)    | 2.18(9)  | 2.634(4) | 106(7)     | S(5)                                                                |                                                                      |
|                   | OW–HW1···O2   | 0.81        | 2.35     | 3.014(6) | 140        | R <sup>4</sup> <sub>4</sub> (18)                                    |                                                                      |
|                   | OW–HW2···O3   | 0.83        | 2.11     | 2.844(5) | 148        | D                                                                   |                                                                      |
|                   | OW–HW2···O4   | 0.83        | 2.42     | 3.036(6) | 132        | C <sup>2</sup> <sub>2</sub> (4)                                     |                                                                      |
|                   | O3–H3···OW    | 0.99(10)    | 1.91(10) | 2.844(5) | 157(8)     | R <sup>4</sup> <sub>4</sub> (18)                                    |                                                                      |
|                   | O4–H4···OW    | 0.73        | 2.01     | 2.730(5) | 172        | C <sup>2</sup> <sub>2</sub> (4)                                     |                                                                      |
| MH I<br>BIJDON03  | O1–H1···O2B   | 0.874(2)    | 1.720(2) | 2.592(2) | 175.13(18) | R <sup>2</sup> <sub>2</sub> (8)                                     |                                                                      |
|                   | O1B–H1B···O2  | 0.918(2)    | 1.801(2) | 2.717(2) | 176.05(19) | R <sup>2</sup> <sub>2</sub> (8)                                     | R <sup>8</sup> <sub>8</sub> (38)                                     |
|                   | O3–H3···O4    | 0.911(2)    | 2.190(2) | 2.655(2) | 110.91(14) | S(5)                                                                | R <sup>4</sup> <sub>4</sub> (8)                                      |
|                   | O3B–H3B···O4B | 0.977(2)    | 2.137(2) | 2.638(2) | 110.12(14) | S(5)                                                                | R <sup>8</sup> <sub>8</sub> (38)                                     |
|                   | OW1–HW1···O2  | 0.944(2)    | 2.053(2) | 2.996(2) | 176.99(18) | D                                                                   |                                                                      |
|                   | OW1–HW2···O3B | 0.883(2)    | 2.230(2) | 2.954(2) | 139.08(19) |                                                                     | R <sup>8</sup> <sub>8</sub> (38)                                     |
|                   | OW1–HW2···O4B | 0.883(2)    | 2.386(2) | 3.019(2) | 128.82(18) | R <sup>4</sup> <sub>4</sub> (8)B                                    |                                                                      |
|                   | O3–H3···OW2   | 0.911(2)    | 2.058(2) | 2.893(2) | 151.75(16) | R <sup>4</sup> <sub>4</sub> (8)                                     | R <sup>8</sup> <sub>8</sub> (38)                                     |
|                   | O4–H4···OW1   | 1.047(2)    | 1.711(2) | 2.733(3) | 164.06(16) | R <sup>4</sup> <sub>4</sub> (8)                                     | R <sup>4</sup> <sub>4</sub> (8)B                                     |
|                   | O3B–H3B···OW1 | 0.977(2)    | 2.039(2) | 2.954(2) | 155.16(18) | R <sup>4</sup> <sub>4</sub> (8)                                     |                                                                      |
|                   | O4B–H4B···OW2 | 0.964(2)    | 1.765(2) | 2.726(2) | 174.21(16) | R <sup>4</sup> <sub>4</sub> (8)<br>R <sup>4</sup> <sub>4</sub> (8)B | R <sup>4</sup> <sub>4</sub> (8)B                                     |
|                   | OW2–HW4···OW1 | 0.902(2)    | 2.080(2) | 2.922(3) | 154.92(19) | R <sup>4</sup> <sub>4</sub> (8)B                                    | R <sup>8</sup> <sub>8</sub> (38)                                     |
|                   | OW2–HW3···O3  | 1.030(2)    | 2.045(2) | 3.012(3) | 155.39(16) | R <sup>4</sup> <sub>4</sub> (8)                                     |                                                                      |
| I<br>WUYNUA       | O1–H1···O2C   | 1.03(6)     | 1.59(6)  | 2.606(5) | 169(5)     | R <sup>2</sup> <sub>2</sub> (8)                                     |                                                                      |
|                   | O1C–H1C···O2  | 0.90(5)     | 1.81(5)  | 2.694(5) | 166(5)     | R <sup>2</sup> <sub>2</sub> (8)                                     | R <sup>2</sup> <sub>4</sub> (18)<br>R <sup>6</sup> <sub>6</sub> (34) |
|                   | O1B–H1B···O2B | 0.94(7)     | 1.66(7)  | 2.595(5) | 175(5)     | R <sup>2</sup> <sub>2</sub> (8)                                     |                                                                      |
|                   | O3–H3···O4    | 0.82        | 2.19     | 2.648(4) | 115        | S(5)                                                                | R <sup>4</sup> <sub>4</sub> (8)                                      |
|                   | O3B–H3B···O4B | 0.82        | 2.11     | 2.591(5) | 117        | S(5)                                                                |                                                                      |
|                   | O4C–H4C···O3C | 0.77(5)     | 2.10(5)  | 2.657(6) | 130(5)     | S(5)                                                                | R <sup>2</sup> <sub>2</sub> (4)                                      |
|                   | O4B–H4B···O3  | 0.82        | 1.99     | 2.769(4) | 159        | R <sup>4</sup> <sub>4</sub> (8)                                     |                                                                      |
|                   | O3B–H3B···O3  | 0.82        | 2.17     | 2.868(5) | 143        | R <sup>4</sup> <sub>4</sub> (8)                                     |                                                                      |
|                   | O3–H3···O2B   | 0.82        | 2.15     | 2.833(4) | 141        | D                                                                   |                                                                      |
|                   | O4C–H4C···O3C | 0.77(5)     | 2.15(5)  | 2.730(6) | 133(5)     | R <sup>2</sup> <sub>2</sub> (4)                                     | R <sup>6</sup> <sub>6</sub> (34)                                     |
|                   | O3C–H3C···O2  | 0.96(8)     | 1.75(8)  | 2.702(6) | 173(8)     | R <sup>2</sup> <sub>4</sub> (18)                                    |                                                                      |
|                   | O4–H4···O4C   | 0.82        | 1.96     | 2.769(5) | 168        | D                                                                   | R <sup>6</sup> <sub>6</sub> (34)                                     |



## 3,5-diOHBA

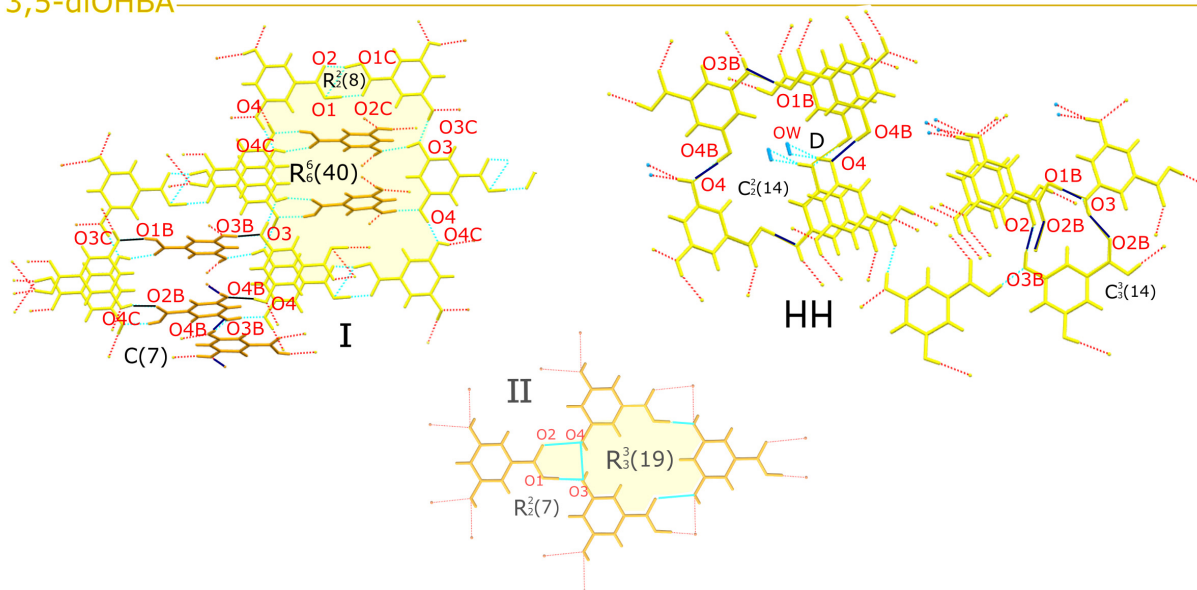

**Figure S15.** Hydrogen bond motifs in crystal structures of all known nonsolvated and hydrated phases of 3,5-diOHBA.

**Table S10.** Hydrogen bond geometric parameters and motifs in crystal structures of all known nonsolvated and hydrated phases of 3,5-diOHBA and corresponding hydrogen bond parameters.

| Phase         | Interaction   | Distance, Å |          |            | D-H...A, ° | Graph set                        |                                  |
|---------------|---------------|-------------|----------|------------|------------|----------------------------------|----------------------------------|
|               |               | X-H         | H-A      | D...A      |            |                                  |                                  |
| I<br>WUYPOW01 | O1-H1...O2C   | 1.12(11)    | 1.54(11) | 2.657(4)   | 179(19)    | R <sub>2</sub> <sup>2</sup> (8)  | R <sub>6</sub> <sup>6</sup> (40) |
|               | O1C-H1C...O2  | 1.16(9)     | 1.51(9)  | 2.637(5)   | 163(10)    | R <sub>2</sub> <sup>2</sup> (8)  | R <sub>6</sub> <sup>6</sup> (40) |
|               | O3-H3C...O3   | 0.80(4)     | 1.89(5)  | 2.689(6)   | 176(3)     |                                  | R <sub>6</sub> <sup>6</sup> (40) |
|               | O4-H5...O4C   | 0.98(11)    | 1.66(12) | 2.636(6)   | 173(10)    |                                  | R <sub>6</sub> <sup>6</sup> (40) |
|               | O3B-H3B...O4B | 0.81(7)     | 1.91(7)  | 2.719(5)   | 173(5)     | C7                               |                                  |
|               | O3-H3...O3B   | 0.88(5)     | 1.91(5)  | 2.766(5)   | 163(5)     | D                                |                                  |
|               | O4B-H5B...O4  | 0.94(5)     | 1.73(5)  | 2.671(4)   | 173(6)     | D                                |                                  |
|               | O1B-H1B...3C  | 0.77(7)     | 1.90(7)  | 2.648(5)   | 163(6)     | D                                |                                  |
| HH<br>OKEMAT  | O4C-H5C...2B  | 0.79(7)     | 1.92(7)  | 2.681(5)   | 161(8)     | D                                |                                  |
|               | O4B-H5B...O4  | 0.84        | 1.97     | 2.809(11)  | 178        | C <sub>4</sub> <sup>4</sup> (26) |                                  |
|               | O1B-H1...O3B  | 0.84        | 1.84     | 2.663(9)   | 165        | C <sub>4</sub> <sup>4</sup> (26) |                                  |
|               | O1-H1...O3    | 0.84        | 1.84     | 2.664(9)   | 167        | C <sub>4</sub> <sup>4</sup> (26) | C <sub>3</sub> <sup>3</sup> (14) |
|               | O4-H5...OW1   | 0.84        | 1.92     | 2.716(15)  | 158        | D                                |                                  |
|               | O4-H5...OW2   | 0.84        | 1.93     | 2.762      | 170'       | D                                |                                  |
|               | O3B-H3B...O2  | 0.84(6)     | 1.84(9)  | 2.663(8)   | 168(16)    | C <sub>3</sub> <sup>3</sup> (14) |                                  |
| II<br>WUYPOW  | O3-H3...O2B   | 0.84(4)     | 1.88(6)  | 2.661(8)   | 155(10)    | C <sub>3</sub> <sup>3</sup> (14) |                                  |
|               | O1-H1...O4    | 1.04(6)     | 1.68(6)  | 2.7131(18) | 177(6)     | R <sub>3</sub> <sup>3</sup> (7)  | R <sub>3</sub> <sup>3</sup> (19) |
|               | O4-H5...O4    | 0.63(5)     | 2.11(6)  | 2.640(2)   | 143(5)     | R <sub>3</sub> <sup>3</sup> (7)  | R <sub>3</sub> <sup>3</sup> (19) |

Gray- crystalline phase was not obtained during the crystal form screening.

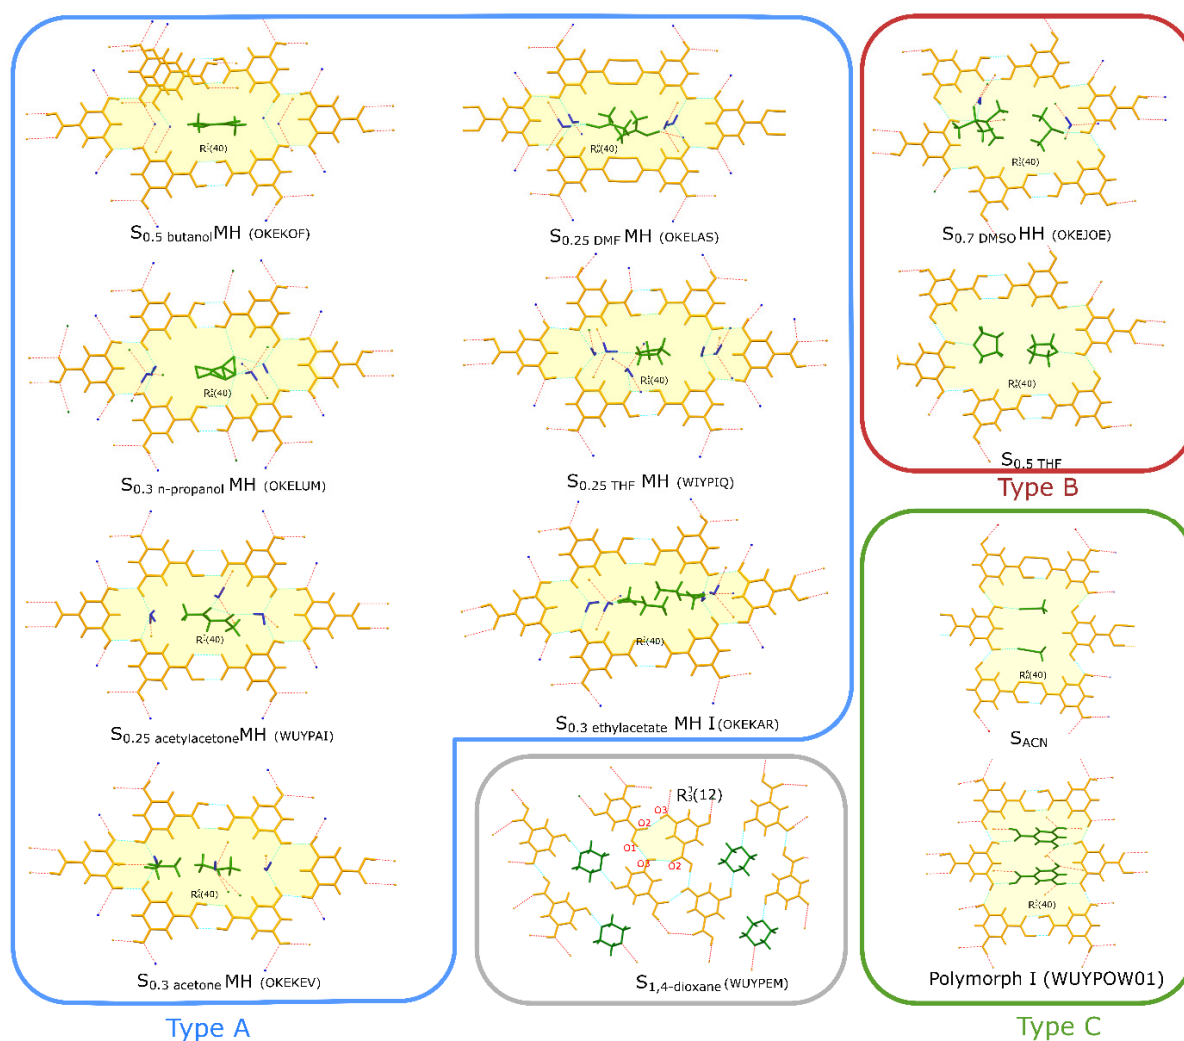

**Figure S16.** The identified types of 3,5-diOHBA solvated forms based on the RHB motif in their structure and hydrogen bond motifs in crystal structure of 3,5-diOHBA 1,4-dioxane solvate.

Type A solvates–RHB motif has elongated shape and water molecules are mandatory. Type B solvates–RHB motif is skewed, and water molecules are not mandatory. Type C solvate–RHB motif is identical to the RHB motif in 3,5-diOHBA polymorph I.

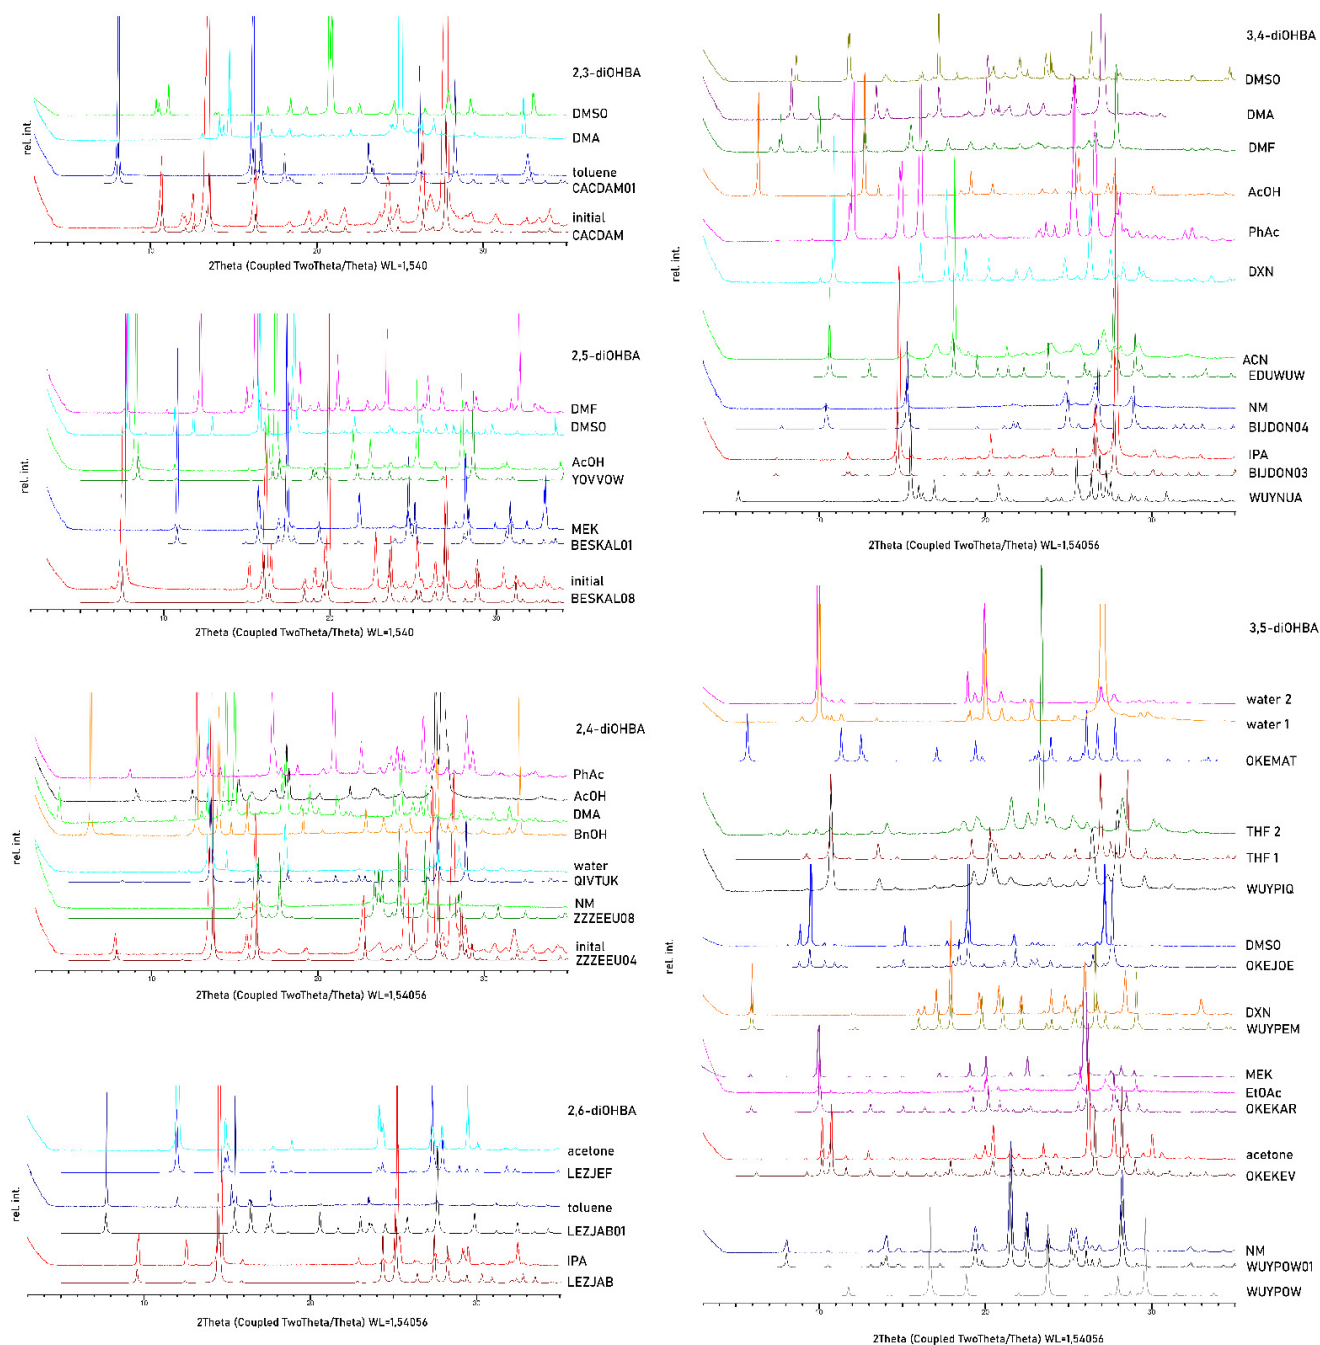

**Figure S17.** Phase identification of selected obtained products using PXRD patterns simulated from the crystal structures deposited in the CSD.
